# Supplementary material for: A preliminary, observational study using whole-blood RNA sequencing reveals differential expression of inflammatory and bone markers post-implantation of percutaneous osseointegrated prostheses
Source: PLoS One. 2022 May 26;17(5):e0268977. doi: 10.1371/journal.pone.0268977 (PMC9135298; doi:10.1371/journal.pone.0268977)
Supplement: S1 Table — (XLSX) [file pone.0268977.s001.xlsx]

## Sheet: wohg_all_sig_genes
id	name	description	biotype	log2FoldChange	p-value	time point
ENSG00000076864	RAP1GAP	RAP1 GTPase activating protein	protein_coding	1.40271	0.0257319	PoS1
ENSG00000236040	CHIAP1		unprocessed_pseudogene	17.2148	0.00227027	PoS1
ENSG00000236866	AL157902.1		lncRNA	25.346	1.26065e-08	PoS1
ENSG00000265972	TXNIP	thioredoxin interacting protein	protein_coding	-0.381004	0.000569924	PoS1
ENSG00000179639	FCER1A	Fc fragment of IgE receptor Ia	protein_coding	-0.86501	0.011272	PoS1
ENSG00000143162	CREG1	cellular repressor of E1A stimulated genes 1	protein_coding	0.376989	0.00267512	PoS1
ENSG00000197965	MPZL1	myelin protein zero like 1	protein_coding	-0.418017	0.0257319	PoS1
ENSG00000152061	RABGAP1L	RAB GTPase activating protein 1 like	protein_coding	-0.3023	2.2029e-05	PoS1
ENSG00000198216	CACNA1E	calcium voltage-gated channel subunit alpha1 E	protein_coding	0.636146	0.00692814	PoS1
ENSG00000116857	TMEM9	transmembrane protein 9	protein_coding	0.321689	0.0328154	PoS1
ENSG00000196890	H2BU1	H2B.U histone 1	protein_coding	0.455792	0.0329008	PoS1
ENSG00000172059	KLF11	Kruppel like factor 11	protein_coding	-0.385825	0.0329008	PoS1
ENSG00000227133	AC011742.1		processed_pseudogene	26.3568	3.23717e-13	PoS1
ENSG00000143995	MEIS1	Meis homeobox 1	protein_coding	-0.658048	0.00609427	PoS1
ENSG00000153574	RPIA	ribose 5-phosphate isomerase A	protein_coding	0.335908	0.0382255	PoS1
ENSG00000115598	IL1RL2	interleukin 1 receptor like 2	protein_coding	21.3308	9.98559e-24	PoS1
ENSG00000116106	EPHA4	EPH receptor A4	protein_coding	-0.311278	0.00344436	PoS1
ENSG00000157017	GHRL	ghrelin and obestatin prepropeptide	protein_coding	0.61121	0.00307391	PoS1
ENSG00000114737	CISH	cytokine inducible SH2 containing protein	protein_coding	0.456301	0.000551418	PoS1
ENSG00000163602	RYBP	RING1 and YY1 binding protein	protein_coding	-0.234122	0.0454665	PoS1
ENSG00000163914	RHO	rhodopsin	protein_coding	20.5263	1.08699e-09	PoS1
ENSG00000177311	ZBTB38	zinc finger and BTB domain containing 38	protein_coding	-0.189206	0.0494826	PoS1
ENSG00000181788	SIAH2	siah E3 ubiquitin protein ligase 2	protein_coding	0.668496	6.90351e-09	PoS1
ENSG00000113810	SMC4	structural maintenance of chromosomes 4	protein_coding	-0.218999	0.00506486	PoS1
ENSG00000250039	AC096719.1		lncRNA	29.9063	2.1041e-26	PoS1
ENSG00000145244	CORIN	corin, serine peptidase	protein_coding	1.23737	0.00307391	PoS1
ENSG00000118777	ABCG2	ATP binding cassette subfamily G member 2 (Junior blood group)	protein_coding	0.563506	0.00692814	PoS1
ENSG00000145354	CISD2	CDGSH iron sulfur domain 2	protein_coding	0.42799	0.0217185	PoS1
ENSG00000164125	GASK1B	golgi associated kinase 1B	protein_coding	0.428287	0.0333275	PoS1
ENSG00000181104	F2R	coagulation factor II thrombin receptor	protein_coding	-0.562649	0.00105855	PoS1
ENSG00000211445	GPX3	glutathione peroxidase 3	protein_coding	-1.07775	0.0392866	PoS1
ENSG00000123643	SLC36A1	solute carrier family 36 member 1	protein_coding	0.267883	0.0227953	PoS1
ENSG00000160883	HK3	hexokinase 3	protein_coding	0.386133	0.034739	PoS1
ENSG00000131459	GFPT2	glutamine-fructose-6-phosphate transaminase 2	protein_coding	-1.44472	0.0480235	PoS1
ENSG00000137198	GMPR	guanosine monophosphate reductase	protein_coding	0.4879	0.0396283	PoS1
ENSG00000227507	LTB	lymphotoxin beta	protein_coding	0.253132	0.0111348	PoS1
ENSG00000112335	SNX3	sorting nexin 3	protein_coding	0.310642	0.0179963	PoS1
ENSG00000237499	WAKMAR2		lncRNA	-0.490913	0.0431324	PoS1
ENSG00000164691	TAGAP	T cell activation RhoGTPase activating protein	protein_coding	-0.314307	0.00692814	PoS1
ENSG00000183696	UPP1	uridine phosphorylase 1	protein_coding	0.298292	0.0150814	PoS1
ENSG00000004799	PDK4	pyruvate dehydrogenase kinase 4	protein_coding	-0.813078	0.0120439	PoS1
ENSG00000214253	FIS1	fission, mitochondrial 1	protein_coding	0.288886	0.018263	PoS1
ENSG00000172331	BPGM	bisphosphoglycerate mutase	protein_coding	0.758136	0.000512871	PoS1
ENSG00000158578	ALAS2	5'-aminolevulinate synthase 2	protein_coding	0.94636	0.000152359	PoS1
ENSG00000234969	AL627389.1		processed_pseudogene	14.4697	9.29008e-05	PoS1
ENSG00000155962	CLIC2	chloride intracellular channel 2	protein_coding	0.662726	2.14614e-05	PoS1
ENSG00000147454	SLC25A37	solute carrier family 25 member 37	protein_coding	0.349209	0.00917748	PoS1
ENSG00000157168	NRG1	neuregulin 1	protein_coding	0.907218	0.0120439	PoS1
ENSG00000133742	CA1	carbonic anhydrase 1	protein_coding	1.09344	3.39424e-05	PoS1
ENSG00000155090	KLF10	Kruppel like factor 10	protein_coding	-0.58819	0.00434671	PoS1
ENSG00000104522	TSTA3	tissue specific transplantation antigen P35B	protein_coding	0.447327	0.0486317	PoS1
ENSG00000137033	IL33	interleukin 33	protein_coding	20.5351	0.00374152	PoS1
ENSG00000147894	C9orf72	C9orf72-SMCR8 complex subunit	protein_coding	0.299301	0.0339619	PoS1
ENSG00000204779	FOXD4L5	forkhead box D4 like 5	protein_coding	-13.6877	0.000165365	PoS1
ENSG00000165092	ALDH1A1	aldehyde dehydrogenase 1 family member A1	protein_coding	-0.64615	0.00403374	PoS1
ENSG00000106723	SPIN1	spindlin 1	protein_coding	-0.207486	0.0360489	PoS1
ENSG00000197724	PHF2	PHD finger protein 2	protein_coding	-0.235128	0.0240424	PoS1
ENSG00000119326	CTNNAL1	catenin alpha like 1	protein_coding	0.77821	2.14427e-06	PoS1
ENSG00000233998	SETP5		processed_pseudogene	29.6268	4.15361e-10	PoS1
ENSG00000254789	AC073172.1		lncRNA	1.28181	0.0329008	PoS1
ENSG00000110090	CPT1A	carnitine palmitoyltransferase 1A	protein_coding	-0.731052	0.0212471	PoS1
ENSG00000250519	AP002784.1		lncRNA	17.9478	6.50442e-07	PoS1
ENSG00000149548	CCDC15	coiled-coil domain containing 15	protein_coding	-0.419062	0.0328154	PoS1
ENSG00000015171	ZMYND11	zinc finger MYND-type containing 11	protein_coding	-0.182079	0.0329008	PoS1
ENSG00000075073	TACR2	tachykinin receptor 2	protein_coding	-10.0447	2.85295e-09	PoS1
ENSG00000204010	IFIT1B	interferon induced protein with tetratricopeptide repeats 1B	protein_coding	0.82777	0.0094133	PoS1
ENSG00000119950	MXI1	MAX interactor 1, dimerization protein	protein_coding	0.535929	5.01341e-05	PoS1
ENSG00000283582	SULT6B2P		unitary_pseudogene	-12.8588	0.0418741	PoS1
ENSG00000279530	AC092881.1		TEC	25.3281	2.94501e-05	PoS1
ENSG00000111144	LTA4H	leukotriene A4 hydrolase	protein_coding	0.292443	0.0450981	PoS1
ENSG00000258288	NENFP2		processed_pseudogene	-18.6718	1.29044e-07	PoS1
ENSG00000274822	MIR6762		miRNA	19.4617	0.00518659	PoS1
ENSG00000022840	RNF10	ring finger protein 10	protein_coding	0.342652	0.0328154	PoS1
ENSG00000278084	AC069503.3		lncRNA	-11.8112	0.000188745	PoS1
ENSG00000198176	TFDP1	transcription factor Dp-1	protein_coding	0.347249	0.00895899	PoS1
ENSG00000275552	AC243965.2		lncRNA	18.0303	0.00458367	PoS1
ENSG00000131981	LGALS3	galectin 3	protein_coding	0.454649	0.00987312	PoS1
ENSG00000258926	AL355916.2		lncRNA	-20.2594	1.81642e-06	PoS1
ENSG00000100558	PLEK2	pleckstrin 2	protein_coding	0.656252	2.73427e-05	PoS1
ENSG00000182512	GLRX5	glutaredoxin 5	protein_coding	0.588502	0.00021102	PoS1
ENSG00000156381	ANKRD9	ankyrin repeat domain 9	protein_coding	0.576569	0.0328388	PoS1
ENSG00000131873	CHSY1	chondroitin sulfate synthase 1	protein_coding	-0.35964	0.0112132	PoS1
ENSG00000189067	LITAF	lipopolysaccharide induced TNF factor	protein_coding	-0.368194	0.0226999	PoS1
ENSG00000184602	SNN	stannin	protein_coding	-0.21025	0.0287673	PoS1
ENSG00000197006	METTL9	methyltransferase like 9	protein_coding	0.308009	0.0154347	PoS1
ENSG00000169877	AHSP	alpha hemoglobin stabilizing protein	protein_coding	1.10058	0.000495161	PoS1
ENSG00000280334	AC009084.2		TEC	17.81	1.57056e-12	PoS1
ENSG00000262533	AC090617.3		lncRNA	-17.7744	1.4116e-06	PoS1
ENSG00000125430	HS3ST3B1	heparan sulfate-glucosamine 3-sulfotransferase 3B1	protein_coding	-0.254139	0.0290462	PoS1
ENSG00000073598	FNDC8	fibronectin type III domain containing 8	protein_coding	-13.8099	0.0217092	PoS1
ENSG00000263874	LINC00672		protein_coding	0.570632	0.00404287	PoS1
ENSG00000271605	MILR1	mast cell immunoglobulin like receptor 1	protein_coding	0.431881	0.00895899	PoS1
ENSG00000267023	LRRC37A16P		transcribed_unprocessed_pseudogene	-13.544	1.76853e-10	PoS1
ENSG00000108950	FAM20A	FAM20A golgi associated secretory pathway pseudokinase	protein_coding	1.73121	0.00636635	PoS1
ENSG00000230258	AC005208.1		lncRNA	-13.9211	0.0120585	PoS1
ENSG00000101782	RIOK3	RIO kinase 3	protein_coding	0.467976	3.15453e-05	PoS1
ENSG00000285790	AC021517.2		lncRNA	21.937	8.56939e-08	PoS1
ENSG00000141469	SLC14A1	solute carrier family 14 member 1 (Kidd blood group)	protein_coding	0.339106	0.0387158	PoS1
ENSG00000197046	SIGLEC15	sialic acid binding Ig like lectin 15	protein_coding	0.884006	0.0329008	PoS1
ENSG00000066926	FECH	ferrochelatase	protein_coding	0.506867	0.0257319	PoS1
ENSG00000122490	SLC66A2	solute carrier family 66 member 2	protein_coding	0.397021	0.000933645	PoS1
ENSG00000225956	AL050320.1		lncRNA	-17.142	0.000288009	PoS1
ENSG00000124098	FAM210B	family with sequence similarity 210 member B	protein_coding	0.485402	0.00623154	PoS1
ENSG00000090013	BLVRB	biliverdin reductase B	protein_coding	0.435518	0.0475527	PoS1
ENSG00000276270	MIR6799		miRNA	-12.9382	0.00344436	PoS1
ENSG00000142512	SIGLEC10	sialic acid binding Ig like lectin 10	protein_coding	0.456241	0.0128493	PoS1
ENSG00000269220	LINC00528		lncRNA	0.396282	0.0302062	PoS1
ENSG00000273342	AP000553.3		lncRNA	23.9791	7.56952e-06	PoS1
ENSG00000189060	H1-0	H1.0 linker histone	protein_coding	0.642015	0.00172502	PoS1
ENSG00000279833	AL031846.2		lncRNA	27.511	2.75413e-12	PoS1
ENSG00000156265	MAP3K7CL	MAP3K7 C-terminal like	protein_coding	-0.66849	0.000125598	PoS1
ENSG00000016490	CLCA1	chloride channel accessory 1	protein_coding	-21.6065	0.00712944	PrS2
ENSG00000236040	CHIAP1		unprocessed_pseudogene	18.439	0.00025888	PrS2
ENSG00000198049	AVPR1B	arginine vasopressin receptor 1B	protein_coding	-23.4971	5.75362e-05	PrS2
ENSG00000227133	AC011742.1		processed_pseudogene	28.2035	6.3702e-17	PrS2
ENSG00000229498	AC105053.1		lncRNA	-22.9313	2.0616e-11	PrS2
ENSG00000115598	IL1RL2	interleukin 1 receptor like 2	protein_coding	21.5813	6.26082e-26	PrS2
ENSG00000235066	AC009303.2		lncRNA	-14.7226	0.00684824	PrS2
ENSG00000223899	SEC13P1		processed_pseudogene	-18.8271	5.06546e-09	PrS2
ENSG00000243795	LINC02044		lncRNA	25.2217	0.00216134	PrS2
ENSG00000145198	VWA5B2	von Willebrand factor A domain containing 5B2	protein_coding	-22.5678	3.55897e-16	PrS2
ENSG00000250039	AC096719.1		lncRNA	29.085	4.35738e-27	PrS2
ENSG00000178343	SHISA3	shisa family member 3	protein_coding	-19.4748	3.85166e-14	PrS2
ENSG00000196620	UGT2B15	UDP glucuronosyltransferase family 2 member B15	protein_coding	-15.6466	0.00180527	PrS2
ENSG00000249061	AC109492.1		lncRNA	-20.9434	1.81467e-14	PrS2
ENSG00000146360	GPR6	G protein-coupled receptor 6	protein_coding	-30.5676	1.88066e-11	PrS2
ENSG00000170381	SEMA3E	semaphorin 3E	protein_coding	-14.6869	6.26431e-06	PrS2
ENSG00000279525	AC002451.2		TEC	-22.8681	2.13742e-09	PrS2
ENSG00000165376	CLDN2	claudin 2	protein_coding	-36.2949	3.2642e-08	PrS2
ENSG00000137033	IL33	interleukin 33	protein_coding	23.1676	0.000148018	PrS2
ENSG00000260390	AL360014.1		lncRNA	-21.559	5.23084e-08	PrS2
ENSG00000283162	AL390726.5		transcribed_unprocessed_pseudogene	-16.2512	2.80424e-06	PrS2
ENSG00000233998	SETP5		processed_pseudogene	26.0644	2.68492e-08	PrS2
ENSG00000250519	AP002784.1		lncRNA	18.0725	9.24919e-08	PrS2
ENSG00000197177	ADGRA1	adhesion G protein-coupled receptor A1	protein_coding	-17.3551	3.52742e-11	PrS2
ENSG00000274976	AC087588.2		lncRNA	-17.336	5.09311e-13	PrS2
ENSG00000279530	AC092881.1		TEC	26.541	2.05367e-06	PrS2
ENSG00000274822	MIR6762		miRNA	20.4489	0.00146254	PrS2
ENSG00000279511	AL356274.2		TEC	-41.2059	4.35738e-27	PrS2
ENSG00000279434	AL049776.1		TEC	0.977629	0.0346597	PrS2
ENSG00000259346	AC105129.2		processed_pseudogene	-20.8968	3.1834e-15	PrS2
ENSG00000280334	AC009084.2		TEC	16.2802	3.53561e-11	PrS2
ENSG00000167941	SOST	sclerostin	protein_coding	30.9299	3.90322e-05	PrS2
ENSG00000230258	AC005208.1		lncRNA	-42.3296	6.54706e-35	PrS2
ENSG00000285790	AC021517.2		lncRNA	16.9068	0.000183149	PrS2
ENSG00000206129	AC006305.2		lncRNA	38.1917	4.18246e-29	PrS2
ENSG00000269235	ZNF350-AS1		lncRNA	-30.4617	3.31613e-41	PrS2
ENSG00000273342	AP000553.3		lncRNA	23.7824	2.80424e-06	PrS2
ENSG00000279833	AL031846.2		lncRNA	26.8507	9.96356e-13	PrS2
ENSG00000285873	AL445253.1		lncRNA	-23.5985	5.32284e-22	PoS2-W1
ENSG00000236866	AL157902.1		lncRNA	26.5845	3.81616e-10	PoS2-W1
ENSG00000152061	RABGAP1L	RAB GTPase activating protein 1 like	protein_coding	-0.219459	0.0283611	PoS2-W1
ENSG00000236278	PEBP1P3		processed_pseudogene	-28.85	1.20229e-32	PoS2-W1
ENSG00000228081	AC092810.2		processed_pseudogene	-43.6245	7.25781e-08	PoS2-W1
ENSG00000233018	AL732292.1		processed_pseudogene	-21.4238	4.34356e-06	PoS2-W1
ENSG00000227133	AC011742.1		processed_pseudogene	25.2063	1.24249e-12	PoS2-W1
ENSG00000235653	AC007253.1		processed_pseudogene	-39.7327	3.41403e-10	PoS2-W1
ENSG00000254157	IGKV2-18		IG_V_pseudogene	-23.9875	5.74009e-12	PoS2-W1
ENSG00000115598	IL1RL2	interleukin 1 receptor like 2	protein_coding	23.175	1.71653e-29	PoS2-W1
ENSG00000243795	LINC02044		lncRNA	24.8183	0.00558235	PoS2-W1
ENSG00000163914	RHO	rhodopsin	protein_coding	22.6527	6.92643e-13	PoS2-W1
ENSG00000251787	RNU7-47P		snRNA	-22.1893	7.23456e-12	PoS2-W1
ENSG00000250039	AC096719.1		lncRNA	26.1626	8.18223e-21	PoS2-W1
ENSG00000229282	AL031963.2		lncRNA	-29.7218	5.32284e-22	PoS2-W1
ENSG00000218472	AL590004.2		processed_pseudogene	-18.7001	1.56731e-12	PoS2-W1
ENSG00000234969	AL627389.1		processed_pseudogene	17.3655	6.56936e-08	PoS2-W1
ENSG00000157600	TMEM164	transmembrane protein 164	protein_coding	-0.251293	0.0320564	PoS2-W1
ENSG00000137033	IL33	interleukin 33	protein_coding	19.146	0.0183741	PoS2-W1
ENSG00000227531	AL162414.1		lncRNA	8.45724	0.00382708	PoS2-W1
ENSG00000233998	SETP5		processed_pseudogene	20.0388	0.000416286	PoS2-W1
ENSG00000254957	AC111188.1		processed_pseudogene	-20.1236	1.3965e-06	PoS2-W1
ENSG00000110090	CPT1A	carnitine palmitoyltransferase 1A	protein_coding	-0.761213	0.0194747	PoS2-W1
ENSG00000250519	AP002784.1		lncRNA	20.7711	2.64487e-10	PoS2-W1
ENSG00000230240	RPL34P19		processed_pseudogene	-29.0529	3.30708e-15	PoS2-W1
ENSG00000283582	SULT6B2P		unitary_pseudogene	-39.9474	1.06256e-28	PoS2-W1
ENSG00000279530	AC092881.1		TEC	31.3906	3.44476e-09	PoS2-W1
ENSG00000258288	NENFP2		processed_pseudogene	-48.5295	2.41467e-61	PoS2-W1
ENSG00000275552	AC243965.2		lncRNA	17.539	0.0103972	PoS2-W1
ENSG00000280334	AC009084.2		TEC	17.0127	4.72698e-12	PoS2-W1
ENSG00000271605	MILR1	mast cell immunoglobulin like receptor 1	protein_coding	0.404178	0.0424296	PoS2-W1
ENSG00000285790	AC021517.2		lncRNA	16.9179	0.000323353	PoS2-W1
ENSG00000206129	AC006305.2		lncRNA	37.2915	7.24661e-27	PoS2-W1
ENSG00000273342	AP000553.3		lncRNA	17.9729	0.0093385	PoS2-W1
ENSG00000253120	IGLV2-34		IG_V_pseudogene	-28.0982	3.39327e-41	PoS2-W1
ENSG00000279833	AL031846.2		lncRNA	23.9981	1.65009e-09	PoS2-W1
ENSG00000223662	SAMSN1-AS1		lncRNA	-47.0751	4.67529e-14	PoS2-W1
ENSG00000224598	RPS5P2		processed_pseudogene	-18.5475	6.50657e-06	PoS2-W1
ENSG00000229052	AL449283.1		transcribed_processed_pseudogene	-21.7055	0.0011684	PoS2-W2
ENSG00000236866	AL157902.1		lncRNA	27.2888	7.63221e-10	PoS2-W2
ENSG00000116132	PRRX1	paired related homeobox 1	protein_coding	-17.4111	1.03002e-07	PoS2-W2
ENSG00000227133	AC011742.1		processed_pseudogene	29.209	3.90187e-16	PoS2-W2
ENSG00000229498	AC105053.1		lncRNA	-21.8527	4.33894e-09	PoS2-W2
ENSG00000254157	IGKV2-18		IG_V_pseudogene	-23.5674	1.48452e-10	PoS2-W2
ENSG00000115598	IL1RL2	interleukin 1 receptor like 2	protein_coding	21.5169	1.38996e-22	PoS2-W2
ENSG00000198914	POU3F3	POU class 3 homeobox 3	protein_coding	-18.2963	1.74813e-05	PoS2-W2
ENSG00000145040	UCN2	urocortin 2	protein_coding	-28.5053	1.35294e-13	PoS2-W2
ENSG00000242290	ZBTB20-AS5		lncRNA	-18.4442	3.15488e-05	PoS2-W2
ENSG00000163914	RHO	rhodopsin	protein_coding	19.3421	2.98136e-08	PoS2-W2
ENSG00000206262	FOXL2NB	FOXL2 neighbor	protein_coding	-29.3878	5.63207e-24	PoS2-W2
ENSG00000181788	SIAH2	siah E3 ubiquitin protein ligase 2	protein_coding	0.390795	0.0382681	PoS2-W2
ENSG00000283154	IQCJ-SCHIP1	schwannomin interacting protein 1	protein_coding	-22.0414	3.38296e-13	PoS2-W2
ENSG00000283154	IQCJ-SCHIP1	IQCJ-SCHIP1 readthrough	protein_coding	-22.0414	3.38296e-13	PoS2-W2
ENSG00000250039	AC096719.1		lncRNA	28.5129	1.38996e-22	PoS2-W2
ENSG00000157765	SLC34A2	solute carrier family 34 member 2	protein_coding	-19.7639	0.000493508	PoS2-W2
ENSG00000178343	SHISA3	shisa family member 3	protein_coding	-18.6071	2.86987e-11	PoS2-W2
ENSG00000196620	UGT2B15	UDP glucuronosyltransferase family 2 member B15	protein_coding	-15.4978	0.00552225	PoS2-W2
ENSG00000113302	IL12B	interleukin 12B	protein_coding	-19.1501	9.64971e-15	PoS2-W2
ENSG00000172201	ID4	inhibitor of DNA binding 4, HLH protein	protein_coding	-22.5342	0.00349027	PoS2-W2
ENSG00000170381	SEMA3E	semaphorin 3E	protein_coding	-14.0853	9.67994e-05	PoS2-W2
ENSG00000128510	CPA4	carboxypeptidase A4	protein_coding	-19.2484	0.000144133	PoS2-W2
ENSG00000173698	ADGRG2	adhesion G protein-coupled receptor G2	protein_coding	-14.6081	1.35294e-13	PoS2-W2
ENSG00000234969	AL627389.1		processed_pseudogene	13.8419	0.000443774	PoS2-W2
ENSG00000171004	HS6ST2	heparan sulfate 6-O-sulfotransferase 2	protein_coding	-22.2372	1.43278e-11	PoS2-W2
ENSG00000155962	CLIC2	chloride intracellular channel 2	protein_coding	0.539233	0.00645326	PoS2-W2
ENSG00000253606	AFG3L2P1		processed_pseudogene	-22.1869	1.15247e-11	PoS2-W2
ENSG00000245970	AP003352.1		lncRNA	-30.9012	3.7534e-19	PoS2-W2
ENSG00000137033	IL33	interleukin 33	protein_coding	27.5078	3.07906e-06	PoS2-W2
ENSG00000260390	AL360014.1		lncRNA	-21.3137	6.52047e-07	PoS2-W2
ENSG00000265368	MIR4476		miRNA	-20.8323	1.32832e-07	PoS2-W2
ENSG00000233998	SETP5		processed_pseudogene	24.6022	1.9732e-06	PoS2-W2
ENSG00000149090	PAMR1	peptidase domain containing associated with muscle regeneration 1	protein_coding	-20.7293	1.03888e-05	PoS2-W2
ENSG00000250519	AP002784.1		lncRNA	20.3271	5.02124e-09	PoS2-W2
ENSG00000279530	AC092881.1		TEC	32.7959	2.51348e-09	PoS2-W2
ENSG00000258288	NENFP2		processed_pseudogene	-48.0992	5.33664e-55	PoS2-W2
ENSG00000139697	SBNO1	strawberry notch homolog 1	protein_coding	-0.18803	0.0382681	PoS2-W2
ENSG00000189238	LINC00943		lncRNA	-21.2775	1.06547e-08	PoS2-W2
ENSG00000275552	AC243965.2		lncRNA	18.4426	0.00552225	PoS2-W2
ENSG00000258926	AL355916.2		lncRNA	-42.6801	1.94304e-31	PoS2-W2
ENSG00000074803	SLC12A1	solute carrier family 12 member 1	protein_coding	-18.0632	1.47375e-09	PoS2-W2
ENSG00000166104	AC126323.1		transcribed_unprocessed_pseudogene	-20.5966	1.47375e-09	PoS2-W2
ENSG00000259544	AC021739.4		lncRNA	-24.4363	1.2324e-07	PoS2-W2
ENSG00000263280	AC003965.1		lncRNA	-21.8611	1.12733e-14	PoS2-W2
ENSG00000169344	UMOD	uromodulin	protein_coding	-25.2024	4.58701e-11	PoS2-W2
ENSG00000280334	AC009084.2		TEC	14.6485	8.7699e-08	PoS2-W2
ENSG00000072736	NFATC3	nuclear factor of activated T cells 3	protein_coding	-0.204782	0.0496041	PoS2-W2
ENSG00000284675	AC116667.2		lncRNA	-14.2786	4.06307e-10	PoS2-W2
ENSG00000126856	PRDM7	PR/SET domain 7	protein_coding	-25.5652	7.32275e-34	PoS2-W2
ENSG00000279296	PRAL		TEC	-21.7505	1.87733e-51	PoS2-W2
ENSG00000167080	B4GALNT2	beta-1,4-N-acetyl-galactosaminyltransferase 2	protein_coding	-19.096	5.2781e-10	PoS2-W2
ENSG00000256124	LINC01152		lncRNA	-21.0032	3.90187e-16	PoS2-W2
ENSG00000283503	LINC01902		lncRNA	-17.2688	2.59293e-09	PoS2-W2
ENSG00000285790	AC021517.2		lncRNA	16.5595	0.000959485	PoS2-W2
ENSG00000206129	AC006305.2		lncRNA	37.2568	2.73229e-24	PoS2-W2
ENSG00000260861	AL049634.2		protein_coding	1.06333	0.0292284	PoS2-W2
ENSG00000225956	AL050320.1		lncRNA	-41.3206	8.64783e-29	PoS2-W2
ENSG00000267510	AC011451.1		lncRNA	-23.9723	7.48507e-15	PoS2-W2
ENSG00000171903	CYP4F11	cytochrome P450 family 4 subfamily F member 11	protein_coding	-17.1704	2.86113e-05	PoS2-W2
ENSG00000237452	BHMG1	basic helix-loop-helix and HMG-box containing 1	protein_coding	-22.2243	4.78651e-05	PoS2-W2
ENSG00000273342	AP000553.3		lncRNA	18.0488	0.0113975	PoS2-W2
ENSG00000279833	AL031846.2		lncRNA	27.8549	4.10204e-12	PoS2-W2
ENSG00000016490	CLCA1	chloride channel accessory 1	protein_coding	-20.8677	0.0126108	PoS2-M1
ENSG00000229052	AL449283.1		transcribed_processed_pseudogene	-21.9013	0.000239211	PoS2-M1
ENSG00000236040	CHIAP1		unprocessed_pseudogene	21.4642	1.88009e-06	PoS2-M1
ENSG00000236866	AL157902.1		lncRNA	26.4023	1.89517e-10	PoS2-M1
ENSG00000227133	AC011742.1		processed_pseudogene	28.4588	1.38954e-17	PoS2-M1
ENSG00000270528	AC021171.1		processed_pseudogene	-22.421	5.89053e-06	PoS2-M1
ENSG00000115598	IL1RL2	interleukin 1 receptor like 2	protein_coding	19.0564	9.15738e-20	PoS2-M1
ENSG00000163914	RHO	rhodopsin	protein_coding	18.923	5.88272e-09	PoS2-M1
ENSG00000250039	AC096719.1		lncRNA	27.8824	9.30388e-25	PoS2-M1
ENSG00000250826	HNRNPA3P13		processed_pseudogene	-28.7622	3.09861e-36	PoS2-M1
ENSG00000164129	NPY5R	neuropeptide Y receptor Y5	protein_coding	-24.8727	8.07134e-06	PoS2-M1
ENSG00000281560	LSINCT5		lncRNA	-20.9473	2.98557e-09	PoS2-M1
ENSG00000285042	AC099499.2		lncRNA	-16.2625	0.000474703	PoS2-M1
ENSG00000249061	AC109492.1		lncRNA	-19.0425	6.62819e-12	PoS2-M1
ENSG00000280780	JAKMIP2-AS1		lncRNA	26.9872	0.025958	PoS2-M1
ENSG00000218472	AL590004.2		processed_pseudogene	-18.8488	2.00399e-13	PoS2-M1
ENSG00000282024	AL009031.1		lncRNA	-26.4681	0.0346207	PoS2-M1
ENSG00000170419	VSTM2A	V-set and transmembrane domain containing 2A	protein_coding	-26.4618	2.34941e-22	PoS2-M1
ENSG00000234969	AL627389.1		processed_pseudogene	15.2046	5.27901e-06	PoS2-M1
ENSG00000181433	SAGE1	sarcoma antigen 1	protein_coding	-22.3761	1.94891e-05	PoS2-M1
ENSG00000137033	IL33	interleukin 33	protein_coding	24.9631	1.08019e-05	PoS2-M1
ENSG00000233998	SETP5		processed_pseudogene	26.0113	2.00287e-08	PoS2-M1
ENSG00000254957	AC111188.1		processed_pseudogene	-17.2098	8.03206e-05	PoS2-M1
ENSG00000149090	PAMR1	peptidase domain containing associated with muscle regeneration 1	protein_coding	-21.5593	3.15349e-07	PoS2-M1
ENSG00000186652	PRG2	proteoglycan 2, pro eosinophil major basic protein	protein_coding	-24.9611	1.7329e-07	PoS2-M1
ENSG00000250519	AP002784.1		lncRNA	20.2358	4.00881e-10	PoS2-M1
ENSG00000230240	RPL34P19		processed_pseudogene	-31.277	5.39219e-19	PoS2-M1
ENSG00000279530	AC092881.1		TEC	27.3269	4.72614e-07	PoS2-M1
ENSG00000258926	AL355916.2		lncRNA	-43.1758	4.25046e-37	PoS2-M1
ENSG00000259737	AC087516.2		lncRNA	-27.3203	1.91662e-07	PoS2-M1
ENSG00000280334	AC009084.2		TEC	16.7769	5.62746e-12	PoS2-M1
ENSG00000285790	AC021517.2		lncRNA	21.4647	3.1114e-08	PoS2-M1
ENSG00000206129	AC006305.2		lncRNA	41.3993	3.01234e-35	PoS2-M1
ENSG00000269086	AC008555.2		lncRNA	-21.4906	1.55732e-08	PoS2-M1
ENSG00000237452	BHMG1	basic helix-loop-helix and HMG-box containing 1	protein_coding	-22.7222	3.94963e-06	PoS2-M1
ENSG00000204866	IGFL2	IGF like family member 2	protein_coding	-20.4692	2.39679e-17	PoS2-M1
ENSG00000104826	LHB	luteinizing hormone subunit beta	protein_coding	-21.9936	1.64275e-08	PoS2-M1
ENSG00000273342	AP000553.3		lncRNA	28.2454	1.4872e-09	PoS2-M1
ENSG00000285873	AL445253.1		lncRNA	-23.0239	1.29501e-20	PoS2-M3
ENSG00000203963	C1orf141	chromosome 1 open reading frame 141	protein_coding	24.1615	0.0388567	PoS2-M3
ENSG00000236040	CHIAP1		unprocessed_pseudogene	24.3252	3.38784e-08	PoS2-M3
ENSG00000236866	AL157902.1		lncRNA	25.4424	4.19122e-09	PoS2-M3
ENSG00000116132	PRRX1	paired related homeobox 1	protein_coding	-17.6223	1.56546e-08	PoS2-M3
ENSG00000229663	DPY19L4P1		processed_pseudogene	-21.0361	4.12666e-10	PoS2-M3
ENSG00000227133	AC011742.1		processed_pseudogene	24.1214	1.76706e-11	PoS2-M3
ENSG00000240864	IGKV1-16		IG_V_gene	1.78679	0.0205577	PoS2-M3
ENSG00000115598	IL1RL2	interleukin 1 receptor like 2	protein_coding	22.026	3.90015e-26	PoS2-M3
ENSG00000281708	ERC2-IT1		lncRNA	-19.3826	0.00280936	PoS2-M3
ENSG00000239572	AC108749.1		lncRNA	-23.5573	4.2137e-15	PoS2-M3
ENSG00000243795	LINC02044		lncRNA	22.4864	0.0314685	PoS2-M3
ENSG00000163914	RHO	rhodopsin	protein_coding	21.0744	6.21685e-11	PoS2-M3
ENSG00000250039	AC096719.1		lncRNA	27.4595	1.21025e-22	PoS2-M3
ENSG00000271980	AC012640.6		lncRNA	31.8737	0.00167905	PoS2-M3
ENSG00000285042	AC099499.2		lncRNA	-16.0419	0.00162623	PoS2-M3
ENSG00000205695	AL390205.1		processed_pseudogene	11.2245	0.024146	PoS2-M3
ENSG00000242703	CCT4P1		processed_pseudogene	-21.3122	0.00299062	PoS2-M3
ENSG00000234969	AL627389.1		processed_pseudogene	20.1089	5.60621e-11	PoS2-M3
ENSG00000253641	AC104964.1		lncRNA	-0.855856	0.0315924	PoS2-M3
ENSG00000227531	AL162414.1		lncRNA	8.5663	0.00261739	PoS2-M3
ENSG00000233998	SETP5		processed_pseudogene	31.4912	3.26309e-12	PoS2-M3
ENSG00000254957	AC111188.1		processed_pseudogene	-16.8248	0.000393239	PoS2-M3
ENSG00000250519	AP002784.1		lncRNA	23.069	7.19879e-13	PoS2-M3
ENSG00000254939	AP003038.1		processed_pseudogene	-30.6658	2.13531e-16	PoS2-M3
ENSG00000172375	C2CD2L	C2CD2 like	protein_coding	-0.229766	0.0442352	PoS2-M3
ENSG00000122859	NEUROG3	neurogenin 3	protein_coding	-21.9735	1.08823e-29	PoS2-M3
ENSG00000197177	ADGRA1	adhesion G protein-coupled receptor A1	protein_coding	-15.6209	2.04968e-08	PoS2-M3
ENSG00000274976	AC087588.2		lncRNA	-17.0148	6.43896e-12	PoS2-M3
ENSG00000139219	COL2A1	collagen type II alpha 1 chain	protein_coding	-23.3466	1.09115e-10	PoS2-M3
ENSG00000279530	AC092881.1		TEC	33.1196	2.28869e-10	PoS2-M3
ENSG00000274822	MIR6762		miRNA	23.9072	4.44754e-05	PoS2-M3
ENSG00000213232	PPP1R2P10		processed_pseudogene	-19.7282	0.00782907	PoS2-M3
ENSG00000211931	IGHD2-2		IG_D_gene	-29.4809	2.96269e-13	PoS2-M3
ENSG00000184507	NUTM1	NUT midline carcinoma family member 1	protein_coding	-28.5163	1.09655e-23	PoS2-M3
ENSG00000140465	CYP1A1	cytochrome P450 family 1 subfamily A member 1	protein_coding	-20.0126	1.59301e-20	PoS2-M3
ENSG00000280334	AC009084.2		TEC	17.6959	7.19879e-13	PoS2-M3
ENSG00000072778	ACADVL	acyl-CoA dehydrogenase very long chain	protein_coding	-0.262798	0.024146	PoS2-M3
ENSG00000167080	B4GALNT2	beta-1,4-N-acetyl-galactosaminyltransferase 2	protein_coding	-20.3585	2.078e-12	PoS2-M3
ENSG00000285790	AC021517.2		lncRNA	16.9329	0.000359604	PoS2-M3
ENSG00000206129	AC006305.2		lncRNA	39.1562	5.95826e-29	PoS2-M3
ENSG00000223669	AL357033.2		lncRNA	-21.3213	6.61546e-22	PoS2-M3
ENSG00000273342	AP000553.3		lncRNA	18.5075	0.00493015	PoS2-M3
ENSG00000279833	AL031846.2		lncRNA	25.1007	1.76599e-10	PoS2-M3
ENSG00000229044	AL451070.1		lncRNA	-27.0988	7.27641e-13	PoS2-M6
ENSG00000236040	CHIAP1		unprocessed_pseudogene	18.0433	0.00061599	PoS2-M6
ENSG00000236866	AL157902.1		lncRNA	28.6289	1.85239e-12	PoS2-M6
ENSG00000233018	AL732292.1		processed_pseudogene	-22.0171	9.81495e-07	PoS2-M6
ENSG00000227133	AC011742.1		processed_pseudogene	27.2545	1.43936e-15	PoS2-M6
ENSG00000115598	IL1RL2	interleukin 1 receptor like 2	protein_coding	17.693	1.78357e-16	PoS2-M6
ENSG00000145040	UCN2	urocortin 2	protein_coding	-30.0513	3.2021e-17	PoS2-M6
ENSG00000239572	AC108749.1		lncRNA	-25.9138	2.36823e-19	PoS2-M6
ENSG00000163914	RHO	rhodopsin	protein_coding	19.9794	5.54483e-10	PoS2-M6
ENSG00000234238	AC022498.1		lncRNA	-24.0952	8.46957e-12	PoS2-M6
ENSG00000250039	AC096719.1		lncRNA	26.2723	1.83518e-21	PoS2-M6
ENSG00000074276	CDHR2	cadherin related family member 2	protein_coding	0.697262	0.00432576	PoS2-M6
ENSG00000229282	AL031963.2		lncRNA	-28.4985	8.21078e-21	PoS2-M6
ENSG00000226874	AC005154.1		processed_pseudogene	-23.5305	4.96282e-14	PoS2-M6
ENSG00000234969	AL627389.1		processed_pseudogene	15.0834	1.33651e-05	PoS2-M6
ENSG00000137033	IL33	interleukin 33	protein_coding	23.0069	0.000219847	PoS2-M6
ENSG00000250519	AP002784.1		lncRNA	17.5016	4.47377e-07	PoS2-M6
ENSG00000279530	AC092881.1		TEC	23.9844	6.91015e-05	PoS2-M6
ENSG00000274822	MIR6762		miRNA	19.7074	0.00411191	PoS2-M6
ENSG00000213232	PPP1R2P10		processed_pseudogene	-19.5486	0.0075607	PoS2-M6
ENSG00000280334	AC009084.2		TEC	17.6945	1.76062e-13	PoS2-M6
ENSG00000251537	AC005324.3		protein_coding	-28.0848	1.01005e-31	PoS2-M6
ENSG00000263624	AC055811.1		lncRNA	-27.4994	2.06621e-50	PoS2-M6
ENSG00000073598	FNDC8	fibronectin type III domain containing 8	protein_coding	-41.4632	2.2163e-31	PoS2-M6
ENSG00000167941	SOST	sclerostin	protein_coding	26.6272	0.00255826	PoS2-M6
ENSG00000285790	AC021517.2		lncRNA	17.158	0.00016753	PoS2-M6
ENSG00000206129	AC006305.2		lncRNA	43.7856	3.35873e-39	PoS2-M6
ENSG00000225956	AL050320.1		lncRNA	-40.9378	6.91094e-32	PoS2-M6
ENSG00000104826	LHB	luteinizing hormone subunit beta	protein_coding	-22.233	1.66448e-08	PoS2-M6
ENSG00000241200	ZNF736P7Y		processed_pseudogene	-23.2783	1.51803e-12	PoS2-M6
ENSG00000279833	AL031846.2		lncRNA	25.2863	4.36166e-11	PoS2-M6
ENSG00000198355	PIM3	Pim-3 proto-oncogene, serine/threonine kinase	protein_coding	0.309022	0.0320032	PoS2-M6
ENSG00000009709	PAX7	paired box 7	protein_coding	-12.4241	0.0132623	PoS2-M9
ENSG00000162607	USP1	ubiquitin specific peptidase 1	protein_coding	-0.189122	0.047052	PoS2-M9
ENSG00000236040	CHIAP1		unprocessed_pseudogene	25.285	7.28719e-07	PoS2-M9
ENSG00000236866	AL157902.1		lncRNA	25.3254	7.25181e-07	PoS2-M9
ENSG00000232237	ASCL5	achaete-scute family bHLH transcription factor 5	protein_coding	-10.1094	0.00122778	PoS2-M9
ENSG00000228081	AC092810.2		processed_pseudogene	-38.3917	0.000215277	PoS2-M9
ENSG00000235862	AL590648.2		lncRNA	-21.8295	6.16407e-13	PoS2-M9
ENSG00000227133	AC011742.1		processed_pseudogene	24.8333	1.86927e-09	PoS2-M9
ENSG00000270528	AC021171.1		processed_pseudogene	-17.9169	0.0296357	PoS2-M9
ENSG00000115598	IL1RL2	interleukin 1 receptor like 2	protein_coding	21.3909	3.14178e-19	PoS2-M9
ENSG00000240912	H2BP3		processed_pseudogene	-29.1326	4.57779e-14	PoS2-M9
ENSG00000242290	ZBTB20-AS5		lncRNA	-19.7269	4.99229e-05	PoS2-M9
ENSG00000163914	RHO	rhodopsin	protein_coding	18.0172	8.70339e-06	PoS2-M9
ENSG00000283154	IQCJ-SCHIP1	schwannomin interacting protein 1	protein_coding	-18.6619	1.4076e-07	PoS2-M9
ENSG00000283154	IQCJ-SCHIP1	IQCJ-SCHIP1 readthrough	protein_coding	-18.6619	1.4076e-07	PoS2-M9
ENSG00000145198	VWA5B2	von Willebrand factor A domain containing 5B2	protein_coding	-20.9644	3.79888e-10	PoS2-M9
ENSG00000250039	AC096719.1		lncRNA	29.5067	3.08094e-20	PoS2-M9
ENSG00000157765	SLC34A2	solute carrier family 34 member 2	protein_coding	-18.6161	0.00965007	PoS2-M9
ENSG00000250826	HNRNPA3P13		processed_pseudogene	-24.994	2.0688e-19	PoS2-M9
ENSG00000248625	AC079768.1		processed_pseudogene	-25.3648	1.20639e-12	PoS2-M9
ENSG00000142319	SLC6A3	solute carrier family 6 member 3	protein_coding	-31.9754	5.17898e-17	PoS2-M9
ENSG00000222706	RN7SKP89		misc_RNA	-24.5808	2.81292e-11	PoS2-M9
ENSG00000234484	AL032821.1		lncRNA	-20.0428	6.70677e-13	PoS2-M9
ENSG00000170419	VSTM2A	V-set and transmembrane domain containing 2A	protein_coding	-20.3245	4.20998e-09	PoS2-M9
ENSG00000279525	AC002451.2		TEC	-19.3566	0.000127956	PoS2-M9
ENSG00000128510	CPA4	carboxypeptidase A4	protein_coding	-16.5985	0.0190001	PoS2-M9
ENSG00000234068	PAGE2	PAGE family member 2	protein_coding	-14.3874	3.36756e-05	PoS2-M9
ENSG00000234969	AL627389.1		processed_pseudogene	15.4431	0.000201817	PoS2-M9
ENSG00000165376	CLDN2	claudin 2	protein_coding	-28.6679	0.00262394	PoS2-M9
ENSG00000253606	AFG3L2P1		processed_pseudogene	-18.2927	2.80629e-06	PoS2-M9
ENSG00000245970	AP003352.1		lncRNA	-30.3551	2.00104e-15	PoS2-M9
ENSG00000253737	AP003469.3		lncRNA	-27.6565	1.21253e-34	PoS2-M9
ENSG00000204779	FOXD4L5	forkhead box D4 like 5	protein_coding	-36.3784	7.97916e-31	PoS2-M9
ENSG00000204446	LINC02872		lncRNA	-19.3226	1.21403e-11	PoS2-M9
ENSG00000230030	AL353742.1		lncRNA	-27.6834	1.77574e-15	PoS2-M9
ENSG00000233998	SETP5		processed_pseudogene	22.3598	0.000361901	PoS2-M9
ENSG00000232511	OR2AH1P		transcribed_unprocessed_pseudogene	-31.8528	1.47827e-07	PoS2-M9
ENSG00000250519	AP002784.1		lncRNA	24.0542	5.38642e-11	PoS2-M9
ENSG00000150051	MKX	mohawk homeobox	protein_coding	-19.7203	8.50025e-14	PoS2-M9
ENSG00000230240	RPL34P19		processed_pseudogene	-28.4209	3.71001e-11	PoS2-M9
ENSG00000150275	PCDH15	protocadherin related 15	protein_coding	-16.0259	4.95873e-06	PoS2-M9
ENSG00000122859	NEUROG3	neurogenin 3	protein_coding	-18.9934	4.55083e-17	PoS2-M9
ENSG00000008323	PLEKHG6	pleckstrin homology and RhoGEF domain containing G6	protein_coding	-29.1856	6.15436e-08	PoS2-M9
ENSG00000213049	HNRNPA1P34		processed_pseudogene	-26.1498	3.26594e-11	PoS2-M9
ENSG00000257674	AC020629.1		processed_pseudogene	-14.9886	7.55241e-07	PoS2-M9
ENSG00000189238	LINC00943		lncRNA	-16.8057	0.000464211	PoS2-M9
ENSG00000235438	ESRRAP2		transcribed_processed_pseudogene	-12.918	2.08319e-06	PoS2-M9
ENSG00000275552	AC243965.2		lncRNA	18.1194	0.0294365	PoS2-M9
ENSG00000258926	AL355916.2		lncRNA	-40.436	2.59257e-23	PoS2-M9
ENSG00000211931	IGHD2-2		IG_D_gene	-26.7584	2.77115e-08	PoS2-M9
ENSG00000157890	MEGF11	multiple EGF like domains 11	protein_coding	-21.1437	4.09681e-41	PoS2-M9
ENSG00000140465	CYP1A1	cytochrome P450 family 1 subfamily A member 1	protein_coding	-19.202	2.02052e-14	PoS2-M9
ENSG00000259544	AC021739.4		lncRNA	-17.6559	0.0100714	PoS2-M9
ENSG00000172236	TPSAB1	tryptase alpha/beta 1	protein_coding	-23.1565	4.22251e-18	PoS2-M9
ENSG00000263280	AC003965.1		lncRNA	-21.0806	2.37508e-11	PoS2-M9
ENSG00000169344	UMOD	uromodulin	protein_coding	-23.0083	1.67666e-07	PoS2-M9
ENSG00000280334	AC009084.2		TEC	15.2029	6.26742e-07	PoS2-M9
ENSG00000284675	AC116667.2		lncRNA	-13.8848	7.01506e-08	PoS2-M9
ENSG00000168418	KCNG4	potassium voltage-gated channel modifier subfamily G member 4	protein_coding	-16.1087	3.26594e-11	PoS2-M9
ENSG00000126856	PRDM7	PR/SET domain 7	protein_coding	-19.996	8.09692e-17	PoS2-M9
ENSG00000125434	SLC25A35	solute carrier family 25 member 35	protein_coding	0.68422	0.0426795	PoS2-M9
ENSG00000283978	MIR365B		miRNA	-30.9052	7.25803e-64	PoS2-M9
ENSG00000131771	PPP1R1B	protein phosphatase 1 regulatory inhibitor subunit 1B	protein_coding	-13.2514	6.73206e-11	PoS2-M9
ENSG00000141738	GRB7	growth factor receptor bound protein 7	protein_coding	-22.8647	4.42516e-11	PoS2-M9
ENSG00000283503	LINC01902		lncRNA	-15.6704	3.91746e-06	PoS2-M9
ENSG00000285790	AC021517.2		lncRNA	19.4191	0.000127956	PoS2-M9
ENSG00000226038	PPIAP21		processed_pseudogene	-16.6504	7.20843e-22	PoS2-M9
ENSG00000171903	CYP4F11	cytochrome P450 family 4 subfamily F member 11	protein_coding	-14.8789	0.00635841	PoS2-M9
ENSG00000269086	AC008555.2		lncRNA	-17.0243	0.00195458	PoS2-M9
ENSG00000104826	LHB	luteinizing hormone subunit beta	protein_coding	-20.4112	4.07089e-05	PoS2-M9
ENSG00000234436	AC245884.2		unprocessed_pseudogene	1.24359	0.0135287	PoS2-M9
ENSG00000252633	RN7SKP282		misc_RNA	-19.2028	4.50999e-08	PoS2-M9
ENSG00000226872	AC002472.1		lncRNA	-26.8036	3.02167e-18	PoS2-M9
ENSG00000227710	AC245517.2		unprocessed_pseudogene	-29.8708	5.33406e-48	PoS2-M9
ENSG00000223662	SAMSN1-AS1		lncRNA	-37.6337	1.50251e-06	PoS2-M9
ENSG00000217026	RPL10P1		processed_pseudogene	-19.4994	1.16579e-18	PoS2-M9
ENSG00000284696	LINC02808		lncRNA	-17.5291	0.00488988	PoS2-M12
ENSG00000236040	CHIAP1		unprocessed_pseudogene	17.5236	0.00275393	PoS2-M12
ENSG00000236866	AL157902.1		lncRNA	25.8471	6.83749e-09	PoS2-M12
ENSG00000198049	AVPR1B	arginine vasopressin receptor 1B	protein_coding	-22.9916	0.000367965	PoS2-M12
ENSG00000233018	AL732292.1		processed_pseudogene	-23.1114	7.25585e-07	PoS2-M12
ENSG00000230026	AL357556.1		processed_pseudogene	-18.5751	1.60243e-10	PoS2-M12
ENSG00000162975	KCNF1	potassium voltage-gated channel modifier subfamily F member 1	protein_coding	-24.9548	4.24076e-05	PoS2-M12
ENSG00000227133	AC011742.1		processed_pseudogene	26.748	1.10121e-13	PoS2-M12
ENSG00000115598	IL1RL2	interleukin 1 receptor like 2	protein_coding	20.4792	6.87687e-21	PoS2-M12
ENSG00000243795	LINC02044		lncRNA	24.0409	0.0149558	PoS2-M12
ENSG00000206262	FOXL2NB	FOXL2 neighbor	protein_coding	-29.5149	1.39821e-24	PoS2-M12
ENSG00000250039	AC096719.1		lncRNA	24.8553	3.09007e-17	PoS2-M12
ENSG00000283314	LINC02357		lncRNA	-31.1523	5.00306e-17	PoS2-M12
ENSG00000250485	EXOC7P1		processed_pseudogene	-26.3391	2.19829e-14	PoS2-M12
ENSG00000172201	ID4	inhibitor of DNA binding 4, HLH protein	protein_coding	-22.8695	0.00275393	PoS2-M12
ENSG00000229165	GDI2P1		processed_pseudogene	-16.2432	1.37401e-11	PoS2-M12
ENSG00000223486	AC092198.1		lncRNA	-26.3698	2.74449e-23	PoS2-M12
ENSG00000234969	AL627389.1		processed_pseudogene	16.603	1.42057e-06	PoS2-M12
ENSG00000171004	HS6ST2	heparan sulfate 6-O-sulfotransferase 2	protein_coding	-25.0647	2.34288e-15	PoS2-M12
ENSG00000102287	GABRE	gamma-aminobutyric acid type A receptor subunit epsilon	protein_coding	-15.5986	7.7818e-10	PoS2-M12
ENSG00000137033	IL33	interleukin 33	protein_coding	19.1549	0.0256036	PoS2-M12
ENSG00000233998	SETP5		processed_pseudogene	26.151	1.60754e-07	PoS2-M12
ENSG00000165970	SLC6A5	solute carrier family 6 member 5	protein_coding	-27.5885	3.42139e-22	PoS2-M12
ENSG00000149090	PAMR1	peptidase domain containing associated with muscle regeneration 1	protein_coding	-21.9286	1.34132e-06	PoS2-M12
ENSG00000232511	OR2AH1P		transcribed_unprocessed_pseudogene	-35.3123	9.7851e-12	PoS2-M12
ENSG00000167771	RCOR2	REST corepressor 2	protein_coding	-15.1529	2.19502e-11	PoS2-M12
ENSG00000279530	AC092881.1		TEC	23.8111	0.00022956	PoS2-M12
ENSG00000275552	AC243965.2		lncRNA	17.1416	0.0225294	PoS2-M12
ENSG00000201376	AL591807.1		snoRNA	-1.43731	0.038901	PoS2-M12
ENSG00000259346	AC105129.2		processed_pseudogene	-19.7198	3.71849e-12	PoS2-M12
ENSG00000280334	AC009084.2		TEC	16.2624	5.08466e-10	PoS2-M12
ENSG00000262533	AC090617.3		lncRNA	-47.7128	1.27363e-54	PoS2-M12
ENSG00000167941	SOST	sclerostin	protein_coding	26.9638	0.003985	PoS2-M12
ENSG00000285790	AC021517.2		lncRNA	20.5721	1.40281e-06	PoS2-M12
ENSG00000206129	AC006305.2		lncRNA	42.1519	2.00388e-32	PoS2-M12
ENSG00000263655	AC090125.1		lncRNA	-26.4072	3.42139e-22	PoS2-M12
ENSG00000171903	CYP4F11	cytochrome P450 family 4 subfamily F member 11	protein_coding	-17.9277	6.38118e-06	PoS2-M12
ENSG00000279103	AC138470.1		TEC	1.71538	0.0467438	PoS2-M12
ENSG00000104826	LHB	luteinizing hormone subunit beta	protein_coding	-21.6235	3.13587e-07	PoS2-M12
ENSG00000235462	TAB3P1		transcribed_unprocessed_pseudogene	-35.4065	2.19829e-14	PoS2-M12
ENSG00000273342	AP000553.3		lncRNA	23.1711	2.9595e-05	PoS2-M12
ENSG00000279833	AL031846.2		lncRNA	29.413	3.20743e-14	PoS2-M12
